# Supplementary material for: Molecular Epidemiology and Surveillance of Human Adenovirus and Rotavirus A Associated Gastroenteritis in Riyadh, Saudi Arabia
Source: MDPI journal article supplement (doi:10.3390/tropicalmed8050279), 2023-05-15
Supplement: s1 [file s1]

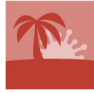

## Supplementary Materials:

**Table S1. Evolutionary divergence estimates between Sequences of HRV**

| Species 1                 | Species 2                 | Distance (d)    |
|---------------------------|---------------------------|-----------------|
| SAU/SA-01/10.24.17        | SAU/SA-02/01.20.18        | 0.060317        |
| <b>SAU/SA-01/10.24.17</b> | IRA/50/2016/G2            | <b>0.005807</b> |
| <b>SAU/SA-01/10.24.17</b> | TUR/TOKAT/2016/G2         | <b>0.005807</b> |
| <b>SAU/SA-01/10.24.17</b> | TUR/FYON/2015/G2          | <b>0.005807</b> |
| <b>SAU/SA-01/10.24.17</b> | CHN/SH-RV76/2015/G2P4     | <b>0.005807</b> |
| <b>SAU/SA-01/10.24.17</b> | KOR/Seoul1602/2011/G2P8   | <b>0.005807</b> |
| <b>SAU/SA-01/10.24.17</b> | RUS/O1270/2011/G2P8       | <b>0.005807</b> |
| <b>SAU/SA-01/10.24.17</b> | RUS/Nov11-N1936/2011/G2P8 | <b>0.005807</b> |
| <b>SAU/SA-01/10.24.17</b> | RUS/O806/2011/G2P4        | <b>0.005807</b> |
| <b>SAU/SA-01/10.24.17</b> | THA/B4285/2017/G2P8       | <b>0.005807</b> |
| SAU/SA-01/10.24.17        | THA/B5686/2018/G2P4       | 0.011660        |
| SAU/SA-01/10.24.17        | THA/B5581/2018/G2P8       | 0.011660        |
| SAU/SA-01/10.24.17        | THA/B4360/2017/G2P4       | 0.011660        |
| SAU/SA-01/10.24.17        | RUS/NS18-A1455/2018/G2P4  | 0.011660        |
| SAU/SA-01/10.24.17        | RUS/NS18-A1454/2018/G2P4  | 0.011660        |
| <b>SAU/SA-01/10.24.17</b> | CHN/G12021182/2012/G2P4   | <b>0.005807</b> |
| <b>SAU/SA-01/10.24.17</b> | BEL/BE34/2006/G2P4        | <b>0.005807</b> |
| <b>SAU/SA-01/10.24.17</b> | IDN/BL-5210/2006/G2P4     | <b>0.005807</b> |
| <b>SAU/SA-01/10.24.17</b> | CHN/G17081040/2017/G2P4   | <b>0.005807</b> |
| SAU/SA-01/10.24.17        | PAK350/2015/G2P4          | 0.011660        |
| SAU/SA-01/10.24.17        | ETH/BD526/2016/G2P4       | 0.017594        |
| SAU/SA-01/10.24.17        | BRA/IP-393 MG/2010/G2P4   | 0.011660        |
| SAU/SA-01/10.24.17        | BGN/J263/2010/G2P4        | 0.011660        |
| SAU/SA-01/10.24.17        | BEL/BE97/2012/G2P4        | 0.011660        |
| SAU/SA-01/10.24.17        | URY/A70-TyT-09/2011/G2P4  | 0.011660        |
| SAU/SA-01/10.24.17        | BGD/Bang-082/2007/G2P4    | 0.011660        |
| SAU/SA-01/10.24.17        | IND/HR-353/2014/G2P4      | 0.011667        |
| SAU/SA-01/10.24.17        | IND/KOL-18-10/2010/G2P8   | 0.011660        |
| SAU/SA-01/10.24.17        | COD/KisB546/2009/G2P4     | 0.011660        |
| SAU/SA-01/10.24.17        | CAN/RT008-09/2009/G2P4    | 0.011660        |
| SAU/SA-01/10.24.17        | ARG/Arg2850/2010/G2P4     | 0.011660        |
| SAU/SA-01/10.24.17        | ECU/2012826166/2011/G2P8  | 0.011660        |
| SAU/SA-01/10.24.17        | AUS/CK20035/2006/G2P4     | 0.011660        |
| SAU/SA-01/10.24.17        | THA/B4940/2018/G2P4       | 0.011660        |
| SAU/SA-01/10.24.17        | PAK/NIBGE-45/2010/G2P6    | 0.011660        |

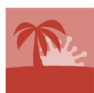

|                           |                           |                 |
|---------------------------|---------------------------|-----------------|
| SAU/SA-01/10.24.17        | BGD/Dhaka28-06/2006/G2P4  | 0.011660        |
| SAU/SA-01/10.24.17        | LBN/R060/2011/G2P4        | 0.017594        |
| SAU/SA-01/10.24.17        | RUS/Nov10-N85/2010/G2P8   | 0.017594        |
| SAU/SA-01/10.24.17        | VEN/CCS-42/2007/G2P4      | 0.017594        |
| SAU/SA-01/10.24.17        | BGN/J253/2010/G2P4        | 0.017594        |
| SAU/SA-01/10.24.17        | IDN/DSA61/2018/G2         | 0.023613        |
| SAU/SA-01/10.24.17        | THA/B4824/2018 G2P4       | 0.017594        |
| SAU/SA-01/10.24.17        | SAU/Taif-1/2013/G1P8      | 0.234866        |
| SAU/SA-01/10.24.17        | SAU/Taif-5/2013/G1P8      | 0.252203        |
| SAU/SA-01/10.24.17        | LBN/A167/2013/G1P8        | 0.261275        |
| SAU/SA-01/10.24.17        | SA/MD28/2007/G9P8         | 0.309554        |
| SAU/SA-01/10.24.17        | LBN/H256/2013/G9P8        | 0.309554        |
| SAU/SA-01/10.24.17        | USA/CNMC122/2011/G12P8    | 0.345199        |
| <b>SAU/SA-02/01.20.18</b> | IRA/50/2016/G2            | <b>0.054032</b> |
| <b>SAU/SA-02/01.20.18</b> | TUR/TOKAT/2016/G2         | <b>0.054032</b> |
| <b>SAU/SA-02/01.20.18</b> | TUR/FYON/2015/G2          | <b>0.054032</b> |
| <b>SAU/SA-02/01.20.18</b> | CHN/SH-RV76/2015/G2P4     | <b>0.054032</b> |
| <b>SAU/SA-02/01.20.18</b> | KOR/Seoul1602/2011/G2P8   | <b>0.054032</b> |
| <b>SAU/SA-02/01.20.18</b> | RUS/O1270/2011/G2P8       | <b>0.054032</b> |
| <b>SAU/SA-02/01.20.18</b> | RUS/Nov11-N1936/2011/G2P8 | <b>0.054032</b> |
| <b>SAU/SA-02/01.20.18</b> | RUS/O806/2011/G2P4        | <b>0.054032</b> |
| <b>SAU/SA-02/01.20.18</b> | THA/B4285/2017/G2P8       | <b>0.054032</b> |
| SAU/SA-02/01.20.18        | THA/B5686/2018/G2P4       | 0.060271        |
| SAU/SA-02/01.20.18        | THA/B5581/2018/G2P8       | 0.060271        |
| SAU/SA-02/01.20.18        | THA/B4360/2017/G2P4       | 0.060271        |
| SAU/SA-02/01.20.18        | RUS/NS18-A1455/2018/G2P4  | 0.060271        |
| SAU/SA-02/01.20.18        | RUS/NS18-A1454/2018/G2P4  | 0.060271        |
| <b>SAU/SA-02/01.20.18</b> | CHN/G12021182/2012/G2P4   | <b>0.054032</b> |
| <b>SAU/SA-02/01.20.18</b> | BEL/BE34/2006/G2P4        | <b>0.054032</b> |
| <b>SAU/SA-02/01.20.18</b> | IDN/BL-5210/2006/G2P4     | <b>0.054032</b> |
| <b>SAU/SA-02/01.20.18</b> | CHN/G17081040/2017/G2P4   | <b>0.054032</b> |
| SAU/SA-02/01.20.18        | PAK350/2015/G2P4          | 0.060271        |
| SAU/SA-02/01.20.18        | ETH/BD526/2016/G2P4       | 0.060275        |
| SAU/SA-02/01.20.18        | BRA/IP-393 MG/2010/G2P4   | 0.060279        |
| SAU/SA-02/01.20.18        | BGN/J263/2010/G2P4        | 0.060271        |
| SAU/SA-02/01.20.18        | BEL/BE97/2012/G2P4        | 0.060279        |
| SAU/SA-02/01.20.18        | URY/A70-TyT-09/2011/G2P4  | 0.060279        |
| SAU/SA-02/01.20.18        | BGD/Bang-082/2007/G2P4    | 0.060271        |
| SAU/SA-02/01.20.18        | IND/HR-353/2014/G2P4      | 0.060310        |
| SAU/SA-02/01.20.18        | IND/KOL-18-10/2010/G2P8   | 0.060271        |



|                    |                                   |          |
|--------------------|-----------------------------------|----------|
| SAU/SA-02/01.20.18 | COD/KisB546/2009/G2P4             | 0.060271 |
| SAU/SA-02/01.20.18 | CAN/RT008-09/2009/G2P4            | 0.060279 |
| SAU/SA-02/01.20.18 | ARG/Arg2850/2010/G2P4             | 0.060279 |
| SAU/SA-02/01.20.18 | ECU/2012826166/2011/G2P8          | 0.060271 |
| SAU/SA-02/01.20.18 | AUS/CK20035/2006/G2P4             | 0.060279 |
| SAU/SA-02/01.20.18 | THA/B4940/2018/G2P4               | 0.060271 |
| SAU/SA-02/01.20.18 | PAK/NIBGE-45/2010/G2P6            | 0.060271 |
| SAU/SA-02/01.20.18 | BGD/Dhaka28-06/2006/G2P4          | 0.060271 |
| SAU/SA-02/01.20.18 | LBN/R060/2011/G2P4                | 0.066610 |
| SAU/SA-02/01.20.18 | RUS/Nov10-N85/2010/G2P8           | 0.066610 |
| SAU/SA-02/01.20.18 | VEN/CCS-42/2007/G2P4              | 0.066610 |
| SAU/SA-02/01.20.18 | BGN/J253/2010/G2P4                | 0.066610 |
| SAU/SA-02/01.20.18 | IDN/DSA61/2018/G2                 | 0.066616 |
| SAU/SA-02/01.20.18 | THA/B4824/2018 G2P4               | 0.066610 |
| SAU/SA-02/01.20.18 | SAU/Taif-1/2013/G1P8              | 0.260027 |
| SAU/SA-02/01.20.18 | SAU/Taif-5/2013/G1P8              | 0.278009 |
| SAU/SA-02/01.20.18 | LBN/A167/2013/G1P8                | 0.287460 |
| SAU/SA-02/01.20.18 | SA/MD28/2007/G9P8                 | 0.313324 |
| SAU/SA-02/01.20.18 | LBN/H256/2013/G9P8                | 0.313324 |
| SAU/SA-02/01.20.18 | USA/CNMC122/2011/G12P8_{outgroup} | 0.330552 |

The count of base substitutions per site from inter- sequences are displayed. Final dataset included a total of 173 positions. The numbers in red referred to the closest distance (least evolutionary divergence for each sequence. The first bracket denoted the closest sequences to SAU/SA-01/10.24.17 (bold), whereas the second bracket refers to sequences closer to SAU/SA-02/01.20.18 (bold).

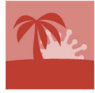

---

**Table S2. Sequences used for phylogenetic analysis of HRV**

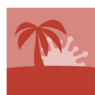

| Accession number | Sequence nomination                                                                                       | Abbreviated name          |
|------------------|-----------------------------------------------------------------------------------------------------------|---------------------------|
| MK050144         | Rotavirus A isolate Human/50/Iran/2016/G2 VP7 (VP7) gene                                                  | IRA/50/2016/G2            |
| MF494809         | Rotavirus G2 isolate 93TOKAT2016/G2 capsid glycoprotein VP7 (VP7) gene                                    | TUR/TOKAT/2016/G2         |
| MF494793         | Rotavirus G2 isolate 13AFYON2015/G2 capsid glycoprotein VP7 (VP7) gene                                    | TUR/FYON/2015/G2          |
| KU532216         | Human rotavirus A isolate RVA/Human-wt/CHN/SH-RV76/2015/G2P[4] major outer capsid protein VP7 gene        | CHN/SH-RV76/2015/G2P4     |
| KF812584         | Human rotavirus A isolate Human/KOR/Seoul1602/2011/G2P[8] VP7 (VP7) gene                                  | KOR/SEOUL1602/2011/G2P8   |
| KF006866         | Human rotavirus A isolate Hu/RUS/O1270/2011/G2P[8] outer capsid protein VP7 (VP7) gene                    | RUS/O1270/2011/G2P8       |
| JX841121         | Rotavirus A isolate Hu/RUS/Nov11-N1936/2011/G2P[8] outer capsid protein VP7 (VP7) gene                    | RUS/Nov11-N1936/2011/G2P8 |
| JX156394         | Human rotavirus A isolate Hu/RUS/O806/2011/G2P[4] outer capsid protein VP7 (VP7) gene                     | RUS/O806/2011/G2P4        |
| MN836878         | Human rotavirus isolate THA/B4285/2017_G2P[8] outer capsid glycoprotein VP7 gene                          | THA/B4285/2017/G2P8       |
| MW058340         | Human rotavirus isolate THA/B5686/2018_G2P[4] outer capsid glycoprotein VP7 gene                          | THA/B5686/2018/G2P4       |
| MW058329         | Human rotavirus isolate THA/B5581/2018_G2P[8] outer capsid glycoprotein VP7 gene                          | THA/B5581/2018/G2P4       |
| MW058176         | Human rotavirus isolate THA/B4360/2017_G2P[4] outer capsid glycoprotein VP7 gene                          | THA/B4360/2018/G2P4       |
| MN577199         | Rotavirus A isolate RVA/Human-wt/RUS/Novosibirsk/NS18-A1455/2018/G2P[4] outer capsid protein (VP7) gene   | RUS/NS18-A1455/2018/G2P4  |
| MN577198         | Rotavirus A isolate RVA/Human-wt/RUS/Novosibirsk/NS18-A1454/2018/G2P[4] outer capsid protein (VP7) gene   | RUS/NS18-A1454/2018/G2P4  |
| MH625736         | Rotavirus A strain RVA/Human-wt/CHN/G12021182/2012/G2P[4] outer capsid protein VP7 gene                   | CHN/G12021182/2012/G2P4   |
| KR705272         | Rotavirus A strain RVA/Human-wt/BEL/BE34/2006/G2P[4] segment 9 VP7 (VP7) gene                             | BEL/BE34/2006/G2P6        |
| JQ837882         | Rotavirus A strain RVA/Human-wt/IDN/BL-5210/2006/G2P[4] outer capsid protein VP7 (VP7) gene               | IDN/BL-5210/2006/G2P4     |
| MN856459         | Rotavirus A isolate RVA/Human-wt/CHN/G17081040/2017/G2P[4] outer capsid protein VP7 (VP7) gene            | CHN/G17081040/2017/G2P4   |
| MH182475         | Human rotavirus A strain RVA/Human-wt/PAK350/2015/G2P4 segment 9 outer capsid glycoprotein VP7 (VP7) gene | PAK/PAK350/2015/G2P4      |
| MH382858         | Rotavirus A strain RVA/Human-wt/ETH/BD526/2016/G2P[4] outer capsid glycoprotein VP7 gene                  | ETH/BD526/2016/G2P4       |
| KF938703         | Human rotavirus A strain RVA/Human-wt/BRA/IP-393_MG/2010/G2P[4] outer capsid protein (VP7) gene           | BRA/IP-393-MG/2010/G2P4   |
| KU248421         | Human rotavirus A strain RVA/Human-wt/BGN/J263/2010/G2P[4] VP7 gene                                       | BGN/J263/2010/G2P4        |
| KR705437         | Rotavirus A strain RVA/Human-wt/BEL/BE97/2012/G2P[4] segment 9 VP7 (VP7) gene                             | BEL/BE97/2012/G2P4        |
| KP271247         | Rotavirus A strain RVA/Env/URY/A70-TyT-09/2011/G2P4 VP7 (VP7) gene                                        | URY/A70-TyT-09/2011/G2P4  |



|          |                                                                                                              |                                   |
|----------|--------------------------------------------------------------------------------------------------------------|-----------------------------------|
| KP882076 | Rotavirus A strain RVA/Human-wt/BGD/Bang-082/2007/G2P[4] segment 9 VP7 (VP7) gene                            | BGD/Bang-082/2007/G2P4            |
| KP054260 | Rotavirus A isolate HRVA/HR-353/G2P[4]/CMBT/MDU/Rohtak VP7 (VP7) gene                                        | IND/HR-353/2014/G2P4              |
| KM008646 | Rotavirus A strain RVA/Human-wt/IND/KOL-18-10/2010/G2P[8] glycoprotein gene                                  | IND/KOL-18-10/2010/G2P8           |
| KJ870843 | Rotavirus A strain RVA/Human-wt/COD/KisB546/2009/G2P[4] VP7 gene                                             | COD/KisB546/2009/G2P4             |
| JQ069521 | Human rotavirus A strain RVA/Human-wt/CAN/RT008-09/2009/G2P4 outer capsid surface protein (G) gene           | CAN/RT008-09/2009/G2P4            |
| KF920558 | Rotavirus A RVA/Human-wt/ARG/Arg2850/2010/G2P[4] VP7 gene                                                    | ARG/Arg2850/2010/G2P4             |
| KC951932 | Rotavirus A isolate RVA/Human-wt/ECU/2012826166/2011/G2P[8] VP7 (VP7) gene                                   | ECU/2012826166/2011/G2P8          |
| KC443405 | Rotavirus A strain RVA/Human-wt/AUS/CK20035/2006/G2P[4] segment 9 capsid glycoprotein VP7 (VP7) gene         | AUS/CK20035/2006/G2P4             |
| MN836952 | Human rotavirus isolate THA/B4940/2018_G2P[4] outer capsid glycoprotein VP7 gene                             | THA/B4940/2018/G2P4               |
| JN001883 | Rotavirus A strain human-wt/PAK/NIBGE-45/2010/G2P6 outer capsid protein VP7 gene                             | PAK/NIBGE-45/2010/G2P6            |
| EF690791 | Rotavirus A strain Hu/G2P[4]/Dhaka28-06/2006/BGD VP7 (VP7) gene                                              | BGD/Dhaka28-06/2006/G2P4          |
| MH591273 | Rotavirus A strain RVA/Human-wt/LBNR060/2011/G2P[4] glycoprotein (VP7) gene                                  | LBN/R060/2011/G2P4                |
| MG932619 | Human rotavirus A strain RVA/Hu-wt/RUS/Novosibirsk/Nov10-N85/2010/G2P[8] outer capsid protein VP7 (VP7) gene | RUS/Nov10-N85/2010/G2P8           |
| KY053848 | Human rotavirus A strain RVA/Human-wt/VEN/CCS-42/2007/G2P[4] glycoprotein (VP7) gene                         | VEN/CCS-42/2007/G2P4              |
| KU356579 | Human rotavirus A strain RVA/Human-wt/BGN/J253/2010/G2P[4] VP7 gene                                          | BGN/J253/2010/G2P4                |
| LC597290 | Rotavirus A RVA/Human-wt/IDN/DSA61/2018/G2 gene for outer capsid glycoprotein                                | IDN/DSA61/2018/G2                 |
| MN836934 | Human rotavirus isolate THA/B4824/2018_G2P[4] outer capsid glycoprotein VP7 gene                             | THA/B4824/2018/G2P4               |
| KP281273 | Human rotavirus A isolate RVA/Human/SAU/Taif-1/2013/G1P[8] VP7                                               | SAU/Taif-1/2013/G1P8              |
| KP281277 | Human rotavirus A isolate RVA/Human/SAU/Taif-5/2013/G1P[8] VP7                                               | SAU/Taif-5/2013/G1P8              |
| MH591261 | Rotavirus A strain RVA/Human-wt/LBNA167/2013/G1P[8] glycoprotein (VP7) gene                                  | LBN/A167/2013/G1P8                |
| MH591313 | Rotavirus A strain RVA/Human-wt/LBNH256/2013/G9P[8] glycoprotein (VP7) gene                                  | LBN/H256/2013/G9P8                |
| AB297791 | Human rotavirus A gene for VP7, strain: MD28                                                                 | SA/MD28/2007/G9P8                 |
| KT920656 | Rotavirus A strain RVA/Human-wt/USA/CNMC122/2011/G12P[8] segment 9 capsid glycoprotein VP7 (VP7) gene        | USA/CNMC122/2011/G12P8 {Outgroup} |

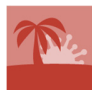

**Table S3. Best fitting model selection for HRV using Maximum Likelihood fits of 24 different nucleotide substitution models**

| Model         | #Param | BIC           | AICc   | lnL    | Invariant | Gamma | R     | Freq A | Freq T | Freq C | Freq G | A=>T | A=>C | A=>G | T=>A | T=>C | T=>G | C=>A | C=>T | C=>G | G=>A | G=>T | G=>C |
|---------------|--------|---------------|--------|--------|-----------|-------|-------|--------|--------|--------|--------|------|------|------|------|------|------|------|------|------|------|------|------|
| <b>T92+I*</b> | 98     | <b>2351.5</b> | 1663.5 | -732.6 | 0.517     | n/a   | 3.030 | 0.342  | 0.342  | 0.158  | 0.158  | 0.04 | 0.02 | 0.12 | 0.04 | 0.12 | 0.02 | 0.04 | 0.27 | 0.02 | 0.27 | 0.04 | 0.02 |
| T92+G+I       | 99     | 2360.6        | 1665.6 | -732.6 | 0.515     | 200   | 3.037 | 0.342  | 0.342  | 0.158  | 0.158  | 0.04 | 0.02 | 0.12 | 0.04 | 0.12 | 0.02 | 0.04 | 0.27 | 0.02 | 0.27 | 0.04 | 0.02 |
| T92+G         | 98     | 2363.7        | 1675.6 | -738.7 | n/a       | 0.802 | 2.695 | 0.342  | 0.342  | 0.158  | 0.158  | 0.04 | 0.02 | 0.12 | 0.04 | 0.12 | 0.02 | 0.04 | 0.26 | 0.02 | 0.26 | 0.04 | 0.02 |
| HKY+I         | 100    | 2365.7        | 1663.7 | -730.6 | 0.517     | n/a   | 3.044 | 0.363  | 0.321  | 0.133  | 0.182  | 0.04 | 0.01 | 0.14 | 0.04 | 0.1  | 0.02 | 0.04 | 0.25 | 0.02 | 0.28 | 0.04 | 0.01 |
| TN93+I        | 101    | 2374.5        | 1665.5 | -730.5 | 0.516     | n/a   | 3.060 | 0.363  | 0.321  | 0.133  | 0.182  | 0.04 | 0.01 | 0.15 | 0.04 | 0.09 | 0.02 | 0.04 | 0.23 | 0.02 | 0.3  | 0.04 | 0.01 |
| HKY+G+I       | 101    | 2374.8        | 1665.7 | -730.6 | 0.516     | 200   | 3.048 | 0.363  | 0.321  | 0.133  | 0.182  | 0.04 | 0.01 | 0.14 | 0.04 | 0.1  | 0.02 | 0.04 | 0.25 | 0.02 | 0.28 | 0.04 | 0.01 |
| HKY+G         | 100    | 2378.1        | 1676.1 | -736.9 | n/a       | 0.802 | 2.676 | 0.363  | 0.321  | 0.133  | 0.182  | 0.04 | 0.02 | 0.14 | 0.04 | 0.1  | 0.02 | 0.04 | 0.24 | 0.02 | 0.27 | 0.04 | 0.02 |
| TN93+G+I      | 102    | 2383.7        | 1667.7 | -730.6 | 0.514     | 200   | 3.128 | 0.363  | 0.321  | 0.133  | 0.182  | 0.04 | 0.01 | 0.16 | 0.04 | 0.09 | 0.02 | 0.04 | 0.22 | 0.02 | 0.31 | 0.04 | 0.01 |
| T92           | 97     | 2386.2        | 1705.2 | -754.5 | n/a       | n/a   | 2.162 | 0.342  | 0.342  | 0.158  | 0.158  | 0.05 | 0.02 | 0.11 | 0.05 | 0.11 | 0.02 | 0.05 | 0.24 | 0.02 | 0.24 | 0.05 | 0.02 |
| TN93+G        | 101    | 2387.0        | 1678.0 | -736.8 | n/a       | 0.802 | 2.684 | 0.363  | 0.321  | 0.133  | 0.182  | 0.04 | 0.02 | 0.14 | 0.05 | 0.09 | 0.02 | 0.05 | 0.23 | 0.02 | 0.29 | 0.04 | 0.02 |
| K2+I          | 97     | 2389.7        | 1708.7 | -756.2 | 0.512     | n/a   | 2.502 | 0.25   | 0.25   | 0.25   | 0.25   | 0.04 | 0.04 | 0.18 | 0.04 | 0.18 | 0.04 | 0.04 | 0.18 | 0.04 | 0.18 | 0.04 | 0.04 |
| GTR+I         | 104    | 2398.0        | 1668.0 | -728.7 | 0.515     | n/a   | 3.022 | 0.363  | 0.321  | 0.133  | 0.182  | 0.03 | 0.03 | 0.15 | 0.03 | 0.09 | 0.01 | 0.09 | 0.23 | 0.01 | 0.29 | 0.03 | 0.01 |
| K2+G+I        | 98     | 2398.8        | 1710.8 | -756.2 | 0.511     | 200   | 2.507 | 0.25   | 0.25   | 0.25   | 0.25   | 0.04 | 0.04 | 0.18 | 0.04 | 0.18 | 0.04 | 0.04 | 0.18 | 0.04 | 0.18 | 0.04 | 0.04 |
| K2+G          | 97     | 2398.9        | 1717.8 | -760.8 | n/a       | 0.802 | 2.375 | 0.25   | 0.25   | 0.25   | 0.25   | 0.04 | 0.04 | 0.18 | 0.04 | 0.18 | 0.04 | 0.04 | 0.18 | 0.04 | 0.18 | 0.04 | 0.04 |
| HKY           | 99     | 2400.5        | 1705.4 | -752.5 | n/a       | n/a   | 2.150 | 0.363  | 0.321  | 0.133  | 0.182  | 0.05 | 0.02 | 0.13 | 0.05 | 0.09 | 0.03 | 0.05 | 0.23 | 0.03 | 0.26 | 0.05 | 0.02 |
| GTR+G+I       | 105    | 2407.0        | 1670.1 | -728.7 | 0.514     | 200   | 3.027 | 0.363  | 0.321  | 0.133  | 0.182  | 0.03 | 0.03 | 0.15 | 0.03 | 0.09 | 0.01 | 0.09 | 0.23 | 0.01 | 0.29 | 0.03 | 0.01 |
| TN93          | 100    | 2409.2        | 1707.1 | -752.4 | n/a       | n/a   | 2.147 | 0.363  | 0.321  | 0.133  | 0.182  | 0.05 | 0.02 | 0.13 | 0.05 | 0.09 | 0.03 | 0.05 | 0.22 | 0.03 | 0.27 | 0.05 | 0.02 |
| GTR+G         | 104    | 2410.2        | 1680.2 | -734.8 | n/a       | 0.802 | 2.633 | 0.363  | 0.321  | 0.133  | 0.182  | 0.03 | 0.03 | 0.14 | 0.04 | 0.1  | 0.01 | 0.09 | 0.23 | 0.02 | 0.28 | 0.02 | 0.01 |
| K2            | 96     | 2416.7        | 1742.7 | -774.2 | n/a       | n/a   | 2.053 | 0.25   | 0.25   | 0.25   | 0.25   | 0.04 | 0.04 | 0.17 | 0.04 | 0.17 | 0.04 | 0.04 | 0.17 | 0.04 | 0.17 | 0.04 | 0.04 |
| GTR           | 103    | 2432.6        | 1709.6 | -750.5 | n/a       | n/a   | 2.134 | 0.363  | 0.321  | 0.133  | 0.182  | 0.05 | 0.03 | 0.13 | 0.05 | 0.09 | 0.02 | 0.09 | 0.22 | 0.02 | 0.26 | 0.03 | 0.01 |
| JC+I          | 96     | 2435.0        | 1761.0 | -783.4 | 0.493     | n/a   | 0.5   | 0.25   | 0.25   | 0.25   | 0.25   | 0.08 | 0.08 | 0.08 | 0.08 | 0.08 | 0.08 | 0.08 | 0.08 | 0.08 | 0.08 | 0.08 | 0.08 |
| JC+G          | 96     | 2442.9        | 1768.8 | -787.3 | n/a       | 0.802 | 0.5   | 0.25   | 0.25   | 0.25   | 0.25   | 0.08 | 0.08 | 0.08 | 0.08 | 0.08 | 0.08 | 0.08 | 0.08 | 0.08 | 0.08 | 0.08 | 0.08 |
| JC+G+I        | 97     | 2444.1        | 1763.1 | -783.4 | 0.493     | 200   | 0.5   | 0.25   | 0.25   | 0.25   | 0.25   | 0.08 | 0.08 | 0.08 | 0.08 | 0.08 | 0.08 | 0.08 | 0.08 | 0.08 | 0.08 | 0.08 | 0.08 |
| JC            | 95     | 2456.2        | 1789.2 | -798.5 | n/a       | n/a   | 0.5   | 0.25   | 0.25   | 0.25   | 0.25   | 0.08 | 0.08 | 0.08 | 0.08 | 0.08 | 0.08 | 0.08 | 0.08 | 0.08 | 0.08 | 0.08 | 0.08 |

\*Models with the lowest BIC scores (Bayesian Information Criterion) are considered to describe the substitution pattern the best (written in red and bold). For each model, AICc value (Akaike Information Criterion, corrected), Maximum Likelihood value (lnL), and the number of parameters (including

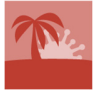

branch lengths) are also depicted above. 5 rate categories-discrete Gamma distribution (+G) was applied for modeling the evolutionary rates non-uniformity among sites and supposing that a certain fraction of sites is evolutionarily invariable (+I). Proposed or estimated values of transition/transversion bias (R) for each model are displayed. They are followed by nucleotide frequencies ( $f$ ) and rates of base substitutions ( $r$ ) for each nucleotide pair.

\* Abbreviations: TR: General Time Reversible; HKY: Hasegawa-Kishino-Yano; TN93: Tamura-Nei; T92: Tamura 3-parameter; K2: Kimura 2-parameter; JC: Jukes-Cantor.



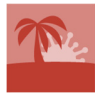

**Table S4. Evolutionary divergence estimates between Sequences of HAdV**

| Species 1                | Species 2                                  | Distance (d)    |
|--------------------------|--------------------------------------------|-----------------|
| HAdV/SAU/1.23.18         | HAdV/BRA /IAL-AD89/2014/41                 | 0.027311        |
| HAdV/SAU/1.23.18         | HAdV/CHN/FX1-152772/2015/41                | 0.035301        |
| HAdV/SAU/1.23.18         | HAdV/SAU/SA12680/2014/41                   | 0.035301        |
| HAdV/SAU/1.23.18         | HAdV/SWD/GyK253/2000/41                    | 0.035301        |
| HAdV/SAU/1.23.18         | HAdV/CHN/D363/2015/41                      | 0.035301        |
| HAdV/SAU/1.23.18         | HAdV/USA/4849/2010/41                      | 0.035301        |
| HAdV/SAU/1.23.18         | HAdV/TUR/ANKARA10/2016/41                  | 0.035301        |
| HAdV/SAU/1.23.18         | HAdV/FRA/MU22/2018/41                      | 0.039327        |
| HAdV/SAU/1.23.18         | HAdV/NETH/Tak/2007/41                      | 0.039327        |
| HAdV/SAU/1.23.18         | HAdV/BRA/IAL-AD694/2016/40                 | 0.072932        |
| HAdV/SAU/1.23.18         | HAdV/CHN/GZ20191121/026/2019/E4_{outgroup} | 0.161870        |
| HAdV/SAU/1.23.18         | HAdV/BRA/IAL-AD178/2016/41                 | 0.031295        |
| HAdV/SAU/1.23.18         | HAdV/IRQ/MU35/2016/41                      | 0.039327        |
| HAdV/SAU/1.23.18         | HAdV/IND/BDF/2017/41                       | 0.035301        |
| HAdV/SAU/1.23.18         | HAdV/CHN/D240/2015/41                      | 0.035301        |
| HAdV/SAU/1.23.18         | HAdV/JPN/SaP3-3F/2012/41                   | 0.035301        |
| HAdV/SAU/1.23.18         | HAdV/IND/503214/2009/41                    | 0.035301        |
| HAdV/SAU/1.23.18         | HAdv/FIN/HoviX/1979/40                     | 0.081160        |
| HAdV/SAU/1.23.18         | HAdV/BRA/IAL-AD09/2016/41                  | 0.031295        |
| HAdV/SAU/1.23.18         | HAdV/IND/SWR9/2017/41                      | 0.035301        |
| HAdV/SAU/1.23.18         | HAdV/JPN/D27/2011/41                       | 0.035301        |
| HAdV/SAU/1.23.18         | HAdV/CHN/NIVD103/2007/41                   | 0.035301        |
| HAdV/SAU/1.23.18         | HAdV/SAU/SA12303/2014/40                   | 0.081160        |
| HAdV/SAU/1.23.18         | HAdV/JPN/Dugan/2007/40                     | 0.081160        |
| HAdV/SAU/1.23.18         | HAdV/CHN/D240/2015/41                      | 0.035301        |
| HAdV/SAU/1.23.18         | HAdV/CHN/D4/2011/41                        | 0.035301        |
| HAdV/SAU/1.23.18         | HAdV/UK/Dugan/1990/40                      | 0.081160        |
| HAdV/SAU/1.23.18         | HAdV/SAU/SA6749/2014/41                    | 0.043376        |
| HAdV/SAU/1.23.18         | HAdV/BRA/IAL-AD99/2015/40                  | 0.072345        |
| HAdV/SAU/1.23.18         | HAdV/USA/4845/2010/41                      | 0.035301        |
| HAdV/SAU/1.23.18         | HAdV/USA/HS12/2009/41                      | 0.035301        |
| <b>HAdV/SAU/10.12.17</b> | HAdV/SAU/10.25.17                          | <b>0.003841</b> |
| HAdV/SAU/10.12.17        | HAdV/SAU/11.25.17                          | 0.015484        |
| HAdV/SAU/10.12.17        | HAdV/SAU/12.13.17                          | 0.011583        |
| HAdV/SAU/10.12.17        | HAdV/SAU/1.23.18                           | 0.027311        |
| HAdV/SAU/10.12.17        | HAdV/BRA /IAL-AD89/2014/41                 | 0.007702        |
| HAdV/SAU/10.12.17        | HAdV/CHN/FX1-152772/2015/41                | 0.015484        |
| HAdV/SAU/10.12.17        | HAdV/SAU/SA12680/2014/41                   | 0.015484        |



|                          |                                            |                 |
|--------------------------|--------------------------------------------|-----------------|
| HAdV/SAU/10.12.17        | HAdV/SWD/GyK253/2000/41                    | 0.015484        |
| HAdV/SAU/10.12.17        | HAdV/CHN/D363/2015/41                      | 0.015484        |
| HAdV/SAU/10.12.17        | HAdV/USA/4849/2010/41                      | 0.015484        |
| HAdV/SAU/10.12.17        | HAdV/TUR/ANKARA10/2016/41                  | 0.015484        |
| HAdV/SAU/10.12.17        | HAdV/FRA/MU22/2018/41                      | 0.019406        |
| HAdV/SAU/10.12.17        | HAdV/NETH/Tak/2007/41                      | 0.019406        |
| HAdV/SAU/10.12.17        | HAdV/BRA/IAL-AD694/2016/40                 | 0.043721        |
| HAdV/SAU/10.12.17        | HAdV/CHN/GZ20191121/026/2019/E4_{outgroup} | 0.133873        |
| <b>HAdV/SAU/10.12.17</b> | <b>HAdV/BRA/IAL-AD178/2016/41</b>          | <b>0.003841</b> |
| HAdV/SAU/10.12.17        | HAdV/IRQ/MU35/2016/41                      | 0.019406        |
| HAdV/SAU/10.12.17        | HAdV/IND/BDF/2017/41                       | 0.015484        |
| HAdV/SAU/10.12.17        | HAdV/CHN/D240/2015/41                      | 0.015484        |
| HAdV/SAU/10.12.17        | HAdV/JPN/SaP3-3F/2012/41                   | 0.015484        |
| HAdV/SAU/10.12.17        | HAdV/IND/503214/2009/41                    | 0.015484        |
| HAdV/SAU/10.12.17        | HAdv/FIN/HoviX/1979/40                     | 0.051745        |
| HAdV/SAU/10.12.17        | HAdV/BRA/IAL-AD09/2016/41                  | 0.007702        |
| HAdV/SAU/10.12.17        | HAdV/IND/SWR9/2017/41                      | 0.015484        |
| HAdV/SAU/10.12.17        | HAdV/JPN/D27/2011/41                       | 0.015484        |
| HAdV/SAU/10.12.17        | HAdV/CHN/NIVD103/2007/41                   | 0.015484        |
| HAdV/SAU/10.12.17        | HAdV/SAU/SA12303/2014/40                   | 0.051745        |
| HAdV/SAU/10.12.17        | HAdV/JPN/Dugan/2007/40                     | 0.051745        |
| HAdV/SAU/10.12.17        | HAdV/CHN/D240/2015/41                      | 0.015484        |
| HAdV/SAU/10.12.17        | HAdV/CHN/D4/2011/41                        | 0.015484        |
| HAdV/SAU/10.12.17        | HAdV/UK/Dugan/1990/40                      | 0.051745        |
| HAdV/SAU/10.12.17        | HAdV/SAU/SA6749/2014/41                    | 0.023348        |
| HAdV/SAU/10.12.17        | HAdV/BRA/IAL-AD99/2015/40                  | 0.043376        |
| HAdV/SAU/10.12.17        | HAdV/USA/4845/2010/41                      | 0.015484        |
| HAdV/SAU/10.12.17        | HAdV/USA/HS12/2009/41                      | 0.015484        |
| HAdV/SAU/10.25.17        | HAdV/SAU/11.25.17                          | 0.011583        |
| HAdV/SAU/10.25.17        | HAdV/SAU/12.13.17                          | 0.007702        |
| HAdV/SAU/10.25.17        | HAdV/SAU/1.23.18                           | 0.031295        |
| <b>HAdV/SAU/10.25.17</b> | <b>HAdV/BRA /IAL-AD89/2014/41</b>          | <b>0.003841</b> |
| HAdV/SAU/10.25.17        | HAdV/CHN/FX1-152772/2015/41                | 0.011583        |
| HAdV/SAU/10.25.17        | HAdV/SAU/SA12680/2014/41                   | 0.011583        |
| HAdV/SAU/10.25.17        | HAdV/SWD/GyK253/2000/41                    | 0.011583        |
| HAdV/SAU/10.25.17        | HAdV/CHN/D363/2015/41                      | 0.011583        |
| HAdV/SAU/10.25.17        | HAdV/USA/4849/2010/41                      | 0.011583        |
| HAdV/SAU/10.25.17        | HAdV/TUR/ANKARA10/2016/41                  | 0.011583        |
| HAdV/SAU/10.25.17        | HAdV/FRA/MU22/2018/41                      | 0.015484        |
| HAdV/SAU/10.25.17        | HAdV/NETH/Tak/2007/41                      | 0.015484        |
| HAdV/SAU/10.25.17        | HAdV/BRA/IAL-AD694/2016/40                 | 0.039639        |
| HAdV/SAU/10.25.17        | HAdV/CHN/GZ20191121/026/2019/E4_{outgroup} | 0.129307        |
| <b>HAdV/SAU/10.25.17</b> | <b>HAdV/BRA/IAL-AD178/2016/41</b>          | <b>0.000000</b> |
| HAdV/SAU/10.25.17        | HAdV/IRQ/MU35/2016/41                      | 0.015484        |
| HAdV/SAU/10.25.17        | HAdV/IND/BDF/2017/41                       | 0.011583        |



|                          |                                            |                 |
|--------------------------|--------------------------------------------|-----------------|
| HAdV/SAU/10.25.17        | HAdV/CHN/D240/2015/41                      | 0.011583        |
| HAdV/SAU/10.25.17        | HAdV/JPN/SaP3-3F/2012/41                   | 0.011583        |
| HAdV/SAU/10.25.17        | HAdV/IND/503214/2009/41                    | 0.011583        |
| HAdV/SAU/10.25.17        | HAdv/FIN/HoviX/1979/40                     | 0.047635        |
| <b>HAdV/SAU/10.25.17</b> | HAdV/BRA/IAL-AD09/2016/41                  | <b>0.003841</b> |
| HAdV/SAU/10.25.17        | HAdV/IND/SWR9/2017/41                      | 0.011583        |
| HAdV/SAU/10.25.17        | HAdV/JPN/D27/2011/41                       | 0.011583        |
| HAdV/SAU/10.25.17        | HAdV/CHN/NIVD103/2007/41                   | 0.011583        |
| HAdV/SAU/10.25.17        | HAdV/SAU/SA12303/2014/40                   | 0.047635        |
| HAdV/SAU/10.25.17        | HAdV/JPN/Dugan/2007/40                     | 0.047635        |
| HAdV/SAU/10.25.17        | HAdV/CHN/D240/2015/41                      | 0.011583        |
| HAdV/SAU/10.25.17        | HAdV/CHN/D4/2011/41                        | 0.011583        |
| HAdV/SAU/10.25.17        | HAdV/UK/Dugan/1990/40                      | 0.047635        |
| HAdV/SAU/10.25.17        | HAdV/SAU/SA6749/2014/41                    | 0.019406        |
| HAdV/SAU/10.25.17        | HAdV/BRA/IAL-AD99/2015/40                  | 0.039327        |
| HAdV/SAU/10.25.17        | HAdV/USA/4845/2010/41                      | 0.011583        |
| HAdV/SAU/10.25.17        | HAdV/USA/HS12/2009/41                      | 0.011583        |
| HAdV/SAU/11.25.17        | HAdV/SAU/12.13.17                          | 0.019406        |
| HAdV/SAU/11.25.17        | HAdV/SAU/1.23.18                           | 0.043376        |
| HAdV/SAU/11.25.17        | HAdV/BRA /IAL-AD89/2014/41                 | 0.015484        |
| HAdV/SAU/11.25.17        | HAdV/CHN/FX1-152772/2015/41                | 0.023348        |
| HAdV/SAU/11.25.17        | HAdV/SAU/SA12680/2014/41                   | 0.023348        |
| HAdV/SAU/11.25.17        | HAdV/SWD/GyK253/2000/41                    | 0.023348        |
| HAdV/SAU/11.25.17        | HAdV/CHN/D363/2015/41                      | 0.023348        |
| HAdV/SAU/11.25.17        | HAdV/USA/4849/2010/41                      | 0.023348        |
| HAdV/SAU/11.25.17        | HAdV/TUR/ANKARA10/2016/41                  | 0.023348        |
| HAdV/SAU/11.25.17        | HAdV/FRA/MU22/2018/41                      | 0.027311        |
| HAdV/SAU/11.25.17        | HAdV/NETH/Tak/2007/41                      | 0.027311        |
| HAdV/SAU/11.25.17        | HAdV/BRA/IAL-AD694/2016/40                 | 0.051952        |
| HAdV/SAU/11.25.17        | HAdV/CHN/GZ20191121/026/2019/E4_{outgroup} | 0.143090        |
| HAdV/SAU/11.25.17        | HAdV/BRA/IAL-AD178/2016/41                 | 0.011583        |
| HAdV/SAU/11.25.17        | HAdV/IRQ/MU35/2016/41                      | 0.027311        |
| HAdV/SAU/11.25.17        | HAdV/IND/BDF/2017/41                       | 0.023348        |
| HAdV/SAU/11.25.17        | HAdV/CHN/D240/2015/41                      | 0.023348        |
| HAdV/SAU/11.25.17        | HAdV/JPN/SaP3-3F/2012/41                   | 0.023348        |
| HAdV/SAU/11.25.17        | HAdV/IND/503214/2009/41                    | 0.023348        |
| HAdV/SAU/11.25.17        | HAdv/FIN/HoviX/1979/40                     | 0.060032        |
| HAdV/SAU/11.25.17        | HAdV/BRA/IAL-AD09/2016/41                  | 0.015484        |
| HAdV/SAU/11.25.17        | HAdV/IND/SWR9/2017/41                      | 0.023348        |
| HAdV/SAU/11.25.17        | HAdV/JPN/D27/2011/41                       | 0.023348        |
| HAdV/SAU/11.25.17        | HAdV/CHN/NIVD103/2007/41                   | 0.023348        |
| HAdV/SAU/11.25.17        | HAdV/SAU/SA12303/2014/40                   | 0.060032        |
| HAdV/SAU/11.25.17        | HAdV/JPN/Dugan/2007/40                     | 0.060032        |
| HAdV/SAU/11.25.17        | HAdV/CHN/D240/2015/41                      | 0.023348        |
| HAdV/SAU/11.25.17        | HAdV/CHN/D4/2011/41                        | 0.023348        |



|                   |                                            |          |
|-------------------|--------------------------------------------|----------|
| HAdV/SAU/11.25.17 | HAdV/UK/Dugan/1990/40                      | 0.060032 |
| HAdV/SAU/11.25.17 | HAdV/SAU/SA6749/2014/41                    | 0.031295 |
| HAdV/SAU/11.25.17 | HAdV/BRA/IAL-AD99/2015/40                  | 0.051539 |
| HAdV/SAU/11.25.17 | HAdV/USA/4845/2010/41                      | 0.023348 |
| HAdV/SAU/11.25.17 | HAdV/USA/HS12/2009/41                      | 0.023348 |
| HAdV/SAU/12.13.17 | HAdV/SAU/1.23.18                           | 0.031295 |
| HAdV/SAU/12.13.17 | HAdV/BRA /IAL-AD89/2014/41                 | 0.011583 |
| HAdV/SAU/12.13.17 | HAdV/CHN/FX1-152772/2015/41                | 0.019406 |
| HAdV/SAU/12.13.17 | HAdV/SAU/SA12680/2014/41                   | 0.019406 |
| HAdV/SAU/12.13.17 | HAdV/SWD/GyK253/2000/41                    | 0.019406 |
| HAdV/SAU/12.13.17 | HAdV/CHN/D363/2015/41                      | 0.019406 |
| HAdV/SAU/12.13.17 | HAdV/USA/4849/2010/41                      | 0.019406 |
| HAdV/SAU/12.13.17 | HAdV/TUR/ANKARA10/2016/41                  | 0.019406 |
| HAdV/SAU/12.13.17 | HAdV/FRA/MU22/2018/41                      | 0.023348 |
| HAdV/SAU/12.13.17 | HAdV/NETH/Tak/2007/41                      | 0.023348 |
| HAdV/SAU/12.13.17 | HAdV/BRA/IAL-AD694/2016/40                 | 0.047825 |
| HAdV/SAU/12.13.17 | HAdV/CHN/GZ20191121/026/2019/E4_{outgroup} | 0.138467 |
| HAdV/SAU/12.13.17 | HAdV/BRA/IAL-AD178/2016/41                 | 0.007702 |
| HAdV/SAU/12.13.17 | HAdV/IRQ/MU35/2016/41                      | 0.023348 |
| HAdV/SAU/12.13.17 | HAdV/IND/BDF/2017/41                       | 0.019406 |
| HAdV/SAU/12.13.17 | HAdV/CHN/D240/2015/41                      | 0.019406 |
| HAdV/SAU/12.13.17 | HAdV/JPN/SaP3-3F/2012/41                   | 0.019406 |
| HAdV/SAU/12.13.17 | HAdV/IND/503214/2009/41                    | 0.019406 |
| HAdV/SAU/12.13.17 | HAdv/FIN/HoviX/1979/40                     | 0.055877 |
| HAdV/SAU/12.13.17 | HAdV/BRA/IAL-AD09/2016/41                  | 0.011583 |
| HAdV/SAU/12.13.17 | HAdV/IND/SWR9/2017/41                      | 0.019406 |
| HAdV/SAU/12.13.17 | HAdV/JPN/D27/2011/41                       | 0.019406 |
| HAdV/SAU/12.13.17 | HAdV/CHN/NIVD103/2007/41                   | 0.019406 |
| HAdV/SAU/12.13.17 | HAdV/SAU/SA12303/2014/40                   | 0.055877 |
| HAdV/SAU/12.13.17 | HAdV/JPN/Dugan/2007/40                     | 0.055877 |
| HAdV/SAU/12.13.17 | HAdV/CHN/D240/2015/41                      | 0.019406 |
| HAdV/SAU/12.13.17 | HAdV/CHN/D4/2011/41                        | 0.019406 |
| HAdV/SAU/12.13.17 | HAdV/UK/Dugan/1990/40                      | 0.055877 |
| HAdV/SAU/12.13.17 | HAdV/SAU/SA6749/2014/41                    | 0.027311 |
| HAdV/SAU/12.13.17 | HAdV/BRA/IAL-AD99/2015/40                  | 0.047447 |
| HAdV/SAU/12.13.17 | HAdV/USA/4845/2010/41                      | 0.019406 |
| HAdV/SAU/12.13.17 | HAdV/USA/HS12/2009/41                      | 0.019406 |
| HAdV/SAU/3.31.17  | HAdV/SAU/9.15.17                           | 0.035301 |
| HAdV/SAU/3.31.17  | HAdV/SAU/10.12.17                          | 0.019406 |
| HAdV/SAU/3.31.17  | HAdV/SAU/10.25.17                          | 0.015484 |
| HAdV/SAU/3.31.17  | HAdV/SAU/11.25.17                          | 0.027311 |
| HAdV/SAU/3.31.17  | HAdV/SAU/12.13.17                          | 0.023348 |
| HAdV/SAU/3.31.17  | HAdV/SAU/1.23.18                           | 0.039327 |
| HAdV/SAU/3.31.17  | HAdV/BRA /IAL-AD89/2014/41                 | 0.011583 |
| HAdV/SAU/3.31.17  | HAdV/CHN/FX1-152772/2015/41                | 0.019406 |



|                  |                                            |          |
|------------------|--------------------------------------------|----------|
| HAdV/SAU/3.31.17 | HAdV/SAU/SA12680/2014/41                   | 0.019406 |
| HAdV/SAU/3.31.17 | HAdV/SWD/GyK253/2000/41                    | 0.019406 |
| HAdV/SAU/3.31.17 | HAdV/CHN/D363/2015/41                      | 0.019406 |
| HAdV/SAU/3.31.17 | HAdV/USA/4849/2010/41                      | 0.019406 |
| HAdV/SAU/3.31.17 | HAdV/TUR/ANKARA10/2016/41                  | 0.019406 |
| HAdV/SAU/3.31.17 | HAdV/FRA/MU22/2018/41                      | 0.023348 |
| HAdV/SAU/3.31.17 | HAdV/NETH/Tak/2007/41                      | 0.023348 |
| HAdV/SAU/3.31.17 | HAdV/BRA/IAL-AD694/2016/40                 | 0.056101 |
| HAdV/SAU/3.31.17 | HAdV/CHN/GZ20191121/026/2019/E4_{outgroup} | 0.147741 |
| HAdV/SAU/3.31.17 | HAdV/BRA/IAL-AD178/2016/41                 | 0.015484 |
| HAdV/SAU/3.31.17 | HAdV/IRQ/MU35/2016/41                      | 0.023348 |
| HAdV/SAU/3.31.17 | HAdV/IND/BDF/2017/41                       | 0.019406 |
| HAdV/SAU/3.31.17 | HAdV/CHN/D240/2015/41                      | 0.019406 |
| HAdV/SAU/3.31.17 | HAdV/JPN/SaP3-3F/2012/41                   | 0.019406 |
| HAdV/SAU/3.31.17 | HAdV/IND/503214/2009/41                    | 0.019406 |
| HAdV/SAU/3.31.17 | HAdV/FIN/HoviX/1979/40                     | 0.064210 |
| HAdV/SAU/3.31.17 | HAdV/BRA/IAL-AD09/2016/41                  | 0.015484 |
| HAdV/SAU/3.31.17 | HAdV/IND/SWR9/2017/41                      | 0.019406 |
| HAdV/SAU/3.31.17 | HAdV/JPN/D27/2011/41                       | 0.019406 |
| HAdV/SAU/3.31.17 | HAdV/CHN/NIVD103/2007/41                   | 0.019406 |
| HAdV/SAU/3.31.17 | HAdV/SAU/SA12303/2014/40                   | 0.064210 |
| HAdV/SAU/3.31.17 | HAdV/JPN/Dugan/2007/40                     | 0.064210 |
| HAdV/SAU/3.31.17 | HAdV/CHN/D240/2015/41                      | 0.019406 |
| HAdV/SAU/3.31.17 | HAdV/CHN/D4/2011/41                        | 0.019406 |
| HAdV/SAU/3.31.17 | HAdV/UK/Dugan/1990/40                      | 0.064210 |
| HAdV/SAU/3.31.17 | HAdV/SAU/SA6749/2014/41                    | 0.027311 |
| HAdV/SAU/3.31.17 | HAdV/BRA/IAL-AD99/2015/40                  | 0.055655 |
| HAdV/SAU/3.31.17 | HAdV/USA/4845/2010/41                      | 0.019406 |
| HAdV/SAU/3.31.17 | HAdV/USA/HS12/2009/41                      | 0.019406 |
| HAdV/SAU/9.15.17 | HAdV/SAU/10.12.17                          | 0.023348 |
| HAdV/SAU/9.15.17 | HAdV/SAU/10.25.17                          | 0.019406 |
| HAdV/SAU/9.15.17 | HAdV/SAU/11.25.17                          | 0.031295 |
| HAdV/SAU/9.15.17 | HAdV/SAU/12.13.17                          | 0.023348 |
| HAdV/SAU/9.15.17 | HAdV/SAU/1.23.18                           | 0.043376 |
| HAdV/SAU/9.15.17 | HAdV/BRA/IAL-AD89/2014/41                  | 0.023348 |
| HAdV/SAU/9.15.17 | HAdV/CHN/FX1-152772/2015/41                | 0.031295 |
| HAdV/SAU/9.15.17 | HAdV/SAU/SA12680/2014/41                   | 0.031295 |
| HAdV/SAU/9.15.17 | HAdV/SWD/GyK253/2000/41                    | 0.031295 |
| HAdV/SAU/9.15.17 | HAdV/CHN/D363/2015/41                      | 0.031295 |
| HAdV/SAU/9.15.17 | HAdV/USA/4849/2010/41                      | 0.031295 |
| HAdV/SAU/9.15.17 | HAdV/TUR/ANKARA10/2016/41                  | 0.031295 |
| HAdV/SAU/9.15.17 | HAdV/FRA/MU22/2018/41                      | 0.027311 |
| HAdV/SAU/9.15.17 | HAdV/NETH/Tak/2007/41                      | 0.035301 |
| HAdV/SAU/9.15.17 | HAdV/BRA/IAL-AD694/2016/40                 | 0.060273 |
| HAdV/SAU/9.15.17 | HAdV/CHN/GZ20191121/026/2019/E4_{outgroup} | 0.152421 |



|                  |                            |          |
|------------------|----------------------------|----------|
| HAdV/SAU/9.15.17 | HAdV/BRA/IAL-AD178/2016/41 | 0.019406 |
| HAdV/SAU/9.15.17 | HAdV/IRQ/MU35/2016/41      | 0.027311 |
| HAdV/SAU/9.15.17 | HAdV/IND/BDF/2017/41       | 0.031295 |
| HAdV/SAU/9.15.17 | HAdV/CHN/D240/2015/41      | 0.031295 |
| HAdV/SAU/9.15.17 | HAdV/JPN/SaP3-3F/2012/41   | 0.031295 |
| HAdV/SAU/9.15.17 | HAdV/IND/503214/2009/41    | 0.031295 |
| HAdV/SAU/9.15.17 | HAdv/FIN/HoviX/1979/40     | 0.068412 |
| HAdV/SAU/9.15.17 | HAdV/BRA/IAL-AD09/2016/41  | 0.023348 |
| HAdV/SAU/9.15.17 | HAdV/IND/SWR9/2017/41      | 0.031295 |
| HAdV/SAU/9.15.17 | HAdV/JPN/D27/2011/41       | 0.031295 |
| HAdV/SAU/9.15.17 | HAdV/CHN/NIVD103/2007/41   | 0.031295 |
| HAdV/SAU/9.15.17 | HAdV/SAU/SA12303/2014/40   | 0.068412 |
| HAdV/SAU/9.15.17 | HAdV/JPN/Dugan/2007/40     | 0.068412 |
| HAdV/SAU/9.15.17 | HAdV/CHN/D240/2015/41      | 0.031295 |
| HAdV/SAU/9.15.17 | HAdV/CHN/D4/2011/41        | 0.031295 |
| HAdV/SAU/9.15.17 | HAdV/UK/Dugan/1990/40      | 0.068412 |
| HAdV/SAU/9.15.17 | HAdV/SAU/SA6749/2014/41    | 0.031295 |
| HAdV/SAU/9.15.17 | HAdV/BRA/IAL-AD99/2015/40  | 0.059793 |
| HAdV/SAU/9.15.17 | HAdV/USA/4845/2010/41      | 0.031295 |
| HAdV/SAU/9.15.17 | HAdV/USA/HS12/2009/41      | 0.031295 |

The count of base substitutions per site from inter- sequences are displayed. Final dataset included a total of 261 positions. The numbers in red referred to the closest distance (least evolutionary divergence for each sequence. However, the numbers in dark red denoted the next closest distance.





**Table S5. Sequences used for phylogenetic analysis of HAdV**

| Accession number | Sequence nomination                                                       | Abbreviated name                           |
|------------------|---------------------------------------------------------------------------|--------------------------------------------|
| MH168374         | Human adenovirus sp. strain HAdVF41/IAL-AD89/2014/BRA hexon protein gene  | HAdV/BRA/IAL-AD89/2014/41                  |
| MK883610         | Human mastadenovirus F isolate Human/China/Shanghai/FX1-152772/2015/41    | HAdV/CHN/FX1-152772/2015/41                |
| MK962810         | Human mastadenovirus F strain SA12680                                     | HAdV/SAU/SA12680/2014/41                   |
| KX868523         | Human adenovirus 41 isolate GyK253                                        | HAdV/SWD/GyK253/2000/41                    |
| KY316163         | Human adenovirus 41 isolate SH/2015/D363                                  | HAdV/CHN/D363/2015/41                      |
| KF303069         | Human adenovirus 41 isolate NY/2010/4849                                  | HAdV/USA/4849/2010/41                      |
| MN830351         | Human adenovirus sp. isolate 41 ANKARA10/16 hexon gene                    | HAdV/TUR/ANKARA10/2016/41                  |
| MW567966         | Human adenovirus 41 isolate MU22/patient E                                | HAdV/FRA/MU22/2018/41                      |
| DQ315364         | Human adenovirus 41 isolate Tak                                           | HAdV/NLD/Tak/2007/41                       |
| MH223634         | Human adenovirus sp. strain HAdVF40/IAL-AD694/2016/BRA hexon protein gene | HAdV/BRA/IAL-AD694/2016/40                 |
| MH223623         | Human adenovirus sp. strain HAdVF41/IAL-AD178/2016/BRA hexon protein gene | HAdV/BRA/IAL-AD178/2016/41                 |
| MG925783         | Human adenovirus 41 isolate MU35                                          | HAdV/IRQ/MU35/2016/41                      |
| MK028955         | Human adenovirus sp. isolate BDF hexon gene                               | HAdV/IND/BDF/2017/41                       |
| KY316162         | Human adenovirus 41 isolate SH/2015/D240                                  | HAdV/CHN/D240/2015/41                      |
| AB728839         | Human adenovirus 41 DNA, complete genome, strain: SaP3-3F                 | HAdV/JPN/SaP3-3F/2012/41                   |
| HQ005289         | Human adenovirus 41 strain 503214/KOL/2009 hexon gene                     | HAdV/IND/503214/2009/41                    |
| KU162869         | Human adenovirus 40 strain HoviX                                          | HAdV/FIN/HoviX/1979/40                     |
| MH223625         | Human adenovirus sp. strain HAdVF41/IAL-AD09/2016/BRA hexon protein gene  | HAdV/BRA/IAL-AD09/2016/41                  |
| MK028954         | Human adenovirus sp. isolate SWR9 hexon gene                              | HAdV/IND/SWR9/2017/41                      |
| AB610523         | Human adenovirus 41 gene for hexon protein, strain: D27                   | HAdV/JPN/D27/2011/41                       |
| HM565136         | Human adenovirus 41 isolate NIVD103                                       | HAdV/CHN/NIVD103/2007/41                   |
| MK955319         | Human mastadenovirus F strain SA12303                                     | HAdV/SAU/SA12303/2014/40                   |
| AB330121         | Human adenovirus 40 gene for hexon, strain: Dugan                         | HAdV/JPN/Dugan/2007/40                     |
| AB610520         | Human adenovirus 41 gene for hexon protein, strain: D4                    | HAdV/CHN/D4/2011/41                        |
| X51782           | Adenovirus type 40 hexon gene                                             | HAdV/UK/Dugan/1990/40                      |
| MK962807         | Human mastadenovirus F strain SA6749                                      | HAdV/SAU/SA6749/2014/41                    |
| MH201117         | Human adenovirus sp. strain HAdVF40/IAL-AD99/2015/BRA hexon protein gene  | HAdV/BRA/IAL-AD99/2015/40                  |
| KF303070         | Human adenovirus 41 isolate NY/2010/4845                                  | HAdV/USA/4845/2010/41                      |
| JF699082         | Human adenovirus 41 Wisconsin isolate HS12 hexon gene                     | HAdV/USA/HS12/2009/41                      |
| MW012924         | Human mastadenovirus E isolate HAdV E4 GZ20191121/026 hexon protein gene  | HAdV/CHN/GZ20191121/026/2019/E4 {Outgroup} |



Table S6. Best fitting model selection for HAdV using Maximum Likelihood fits of 24 different nucleotide substitution models

| Model     | #Param | BIC            | AICc    | lnL    | Invariant | Gamma | R     | Freq A | Freq T | Freq C | Freq G | A=>T | A=>C | A=>G | T=>A | T=>C | T=>G | C=>A | C=>T | C=>G | G=>A | G=>T | G=>C |
|-----------|--------|----------------|---------|--------|-----------|-------|-------|--------|--------|--------|--------|------|------|------|------|------|------|------|------|------|------|------|------|
| <b>JC</b> | 73     | <b>2138.09</b> | 1613.48 | -733.2 | n/a       | n/a   | 0.5   | 0.25   | 0.25   | 0.25   | 0.25   | 0.08 | 0.08 | 0.08 | 0.08 | 0.08 | 0.08 | 0.08 | 0.08 | 0.08 | 0.08 | 0.08 | 0.08 |
| T92       | 75     | 2142.60        | 1603.65 | -726.2 | n/a       | n/a   | 0.658 | 0.202  | 0.202  | 0.298  | 0.298  | 0.06 | 0.09 | 0.12 | 0.06 | 0.12 | 0.09 | 0.06 | 0.08 | 0.09 | 0.08 | 0.06 | 0.09 |
| JC+I      | 74     | 2142.94        | 1611.16 | -731.0 | 0.456     | n/a   | 0.5   | 0.25   | 0.25   | 0.25   | 0.25   | 0.08 | 0.08 | 0.08 | 0.08 | 0.08 | 0.08 | 0.08 | 0.08 | 0.08 | 0.08 | 0.08 | 0.08 |
| JC+G      | 74     | 2143.97        | 1612.19 | -731.5 | n/a       | 0.801 | 0.5   | 0.25   | 0.25   | 0.25   | 0.25   | 0.08 | 0.08 | 0.08 | 0.08 | 0.08 | 0.08 | 0.08 | 0.08 | 0.08 | 0.08 | 0.08 | 0.08 |
| T92+G     | 76     | 2145.96        | 1599.84 | -723.3 | n/a       | 0.808 | 0.663 | 0.202  | 0.202  | 0.298  | 0.298  | 0.06 | 0.09 | 0.12 | 0.06 | 0.12 | 0.09 | 0.06 | 0.08 | 0.09 | 0.08 | 0.06 | 0.09 |
| T92+I     | 76     | 2146.51        | 1600.39 | -723.6 | 0.451     | n/a   | 0.663 | 0.202  | 0.202  | 0.298  | 0.298  | 0.06 | 0.09 | 0.12 | 0.06 | 0.12 | 0.09 | 0.06 | 0.08 | 0.09 | 0.08 | 0.06 | 0.09 |
| K2        | 74     | 2147.54        | 1615.76 | -733.3 | n/a       | n/a   | 0.652 | 0.25   | 0.25   | 0.25   | 0.25   | 0.08 | 0.08 | 0.1  | 0.08 | 0.1  | 0.08 | 0.08 | 0.1  | 0.08 | 0.1  | 0.08 | 0.08 |
| K2+G      | 75     | 2151.06        | 1612.11 | -730.5 | n/a       | 0.800 | 0.658 | 0.25   | 0.25   | 0.25   | 0.25   | 0.08 | 0.08 | 0.1  | 0.08 | 0.1  | 0.08 | 0.08 | 0.1  | 0.08 | 0.1  | 0.08 | 0.08 |
| K2+I      | 75     | 2151.30        | 1612.35 | -730.6 | 0.456     | n/a   | 0.658 | 0.25   | 0.25   | 0.25   | 0.25   | 0.08 | 0.08 | 0.1  | 0.08 | 0.1  | 0.08 | 0.08 | 0.1  | 0.08 | 0.1  | 0.08 | 0.08 |
| JC+G+I    | 75     | 2151.85        | 1612.89 | -730.9 | 0.000     | 0.800 | 0.5   | 0.25   | 0.25   | 0.25   | 0.25   | 0.08 | 0.08 | 0.08 | 0.08 | 0.08 | 0.08 | 0.08 | 0.08 | 0.08 | 0.08 | 0.08 | 0.08 |
| T92+G+I   | 77     | 2155.17        | 1601.87 | -723.3 | 0.000     | 0.808 | 0.663 | 0.202  | 0.202  | 0.298  | 0.298  | 0.06 | 0.09 | 0.12 | 0.06 | 0.12 | 0.09 | 0.06 | 0.08 | 0.09 | 0.08 | 0.06 | 0.09 |
| HKY       | 77     | 2157.61        | 1604.32 | -724.5 | n/a       | n/a   | 0.659 | 0.216  | 0.189  | 0.332  | 0.263  | 0.06 | 0.1  | 0.11 | 0.06 | 0.14 | 0.08 | 0.06 | 0.08 | 0.08 | 0.09 | 0.06 | 0.1  |
| K2+G+I    | 76     | 2160.09        | 1613.97 | -730.4 | 0.000     | 0.800 | 0.658 | 0.25   | 0.25   | 0.25   | 0.25   | 0.08 | 0.08 | 0.1  | 0.08 | 0.1  | 0.08 | 0.08 | 0.1  | 0.08 | 0.1  | 0.08 | 0.08 |
| HKY+G     | 78     | 2162.04        | 1601.57 | -722.2 | n/a       | 0.809 | 0.662 | 0.216  | 0.189  | 0.332  | 0.263  | 0.06 | 0.1  | 0.11 | 0.06 | 0.14 | 0.08 | 0.06 | 0.08 | 0.08 | 0.09 | 0.06 | 0.1  |
| HKY+I     | 78     | 2162.80        | 1602.33 | -722.5 | 0.451     | n/a   | 0.660 | 0.216  | 0.189  | 0.332  | 0.263  | 0.06 | 0.1  | 0.11 | 0.06 | 0.14 | 0.08 | 0.06 | 0.08 | 0.08 | 0.09 | 0.06 | 0.1  |
| TN93      | 78     | 2167.47        | 1607.01 | -724.9 | n/a       | n/a   | 0.662 | 0.216  | 0.189  | 0.332  | 0.263  | 0.06 | 0.1  | 0.09 | 0.06 | 0.15 | 0.08 | 0.06 | 0.09 | 0.08 | 0.08 | 0.06 | 0.1  |
| HKY+G+I   | 79     | 2171.24        | 1603.60 | -722.2 | 0.000     | 0.808 | 0.662 | 0.216  | 0.189  | 0.332  | 0.263  | 0.06 | 0.1  | 0.11 | 0.06 | 0.14 | 0.08 | 0.06 | 0.08 | 0.08 | 0.09 | 0.06 | 0.1  |
| TN93+I    | 79     | 2172.26        | 1604.63 | -722.7 | 0.443     | n/a   | 0.661 | 0.216  | 0.189  | 0.332  | 0.263  | 0.06 | 0.1  | 0.1  | 0.06 | 0.15 | 0.08 | 0.06 | 0.08 | 0.08 | 0.08 | 0.06 | 0.1  |
| TN93+G    | 79     | 2172.45        | 1604.81 | -722.8 | n/a       | 0.838 | 0.662 | 0.216  | 0.189  | 0.332  | 0.263  | 0.06 | 0.1  | 0.1  | 0.06 | 0.15 | 0.08 | 0.06 | 0.08 | 0.08 | 0.08 | 0.06 | 0.1  |
| TN93+G+I  | 80     | 2180.24        | 1605.43 | -722.1 | 0.000     | 0.837 | 0.662 | 0.216  | 0.189  | 0.332  | 0.263  | 0.06 | 0.1  | 0.1  | 0.06 | 0.15 | 0.08 | 0.06 | 0.08 | 0.08 | 0.08 | 0.06 | 0.1  |
| GTR       | 81     | 2191.74        | 1609.77 | -723.2 | n/a       | n/a   | 0.664 | 0.216  | 0.189  | 0.332  | 0.263  | 0.04 | 0.09 | 0.09 | 0.05 | 0.15 | 0.13 | 0.06 | 0.09 | 0.06 | 0.08 | 0.09 | 0.08 |
| GTR+G     | 82     | 2195.48        | 1606.34 | -720.5 | n/a       | 0.860 | 0.663 | 0.216  | 0.189  | 0.332  | 0.263  | 0.04 | 0.09 | 0.1  | 0.05 | 0.15 | 0.13 | 0.06 | 0.08 | 0.06 | 0.08 | 0.09 | 0.08 |
| GTR+I     | 82     | 2195.90        | 1606.77 | -720.7 | 0.433     | n/a   | 0.661 | 0.216  | 0.189  | 0.332  | 0.263  | 0.04 | 0.09 | 0.1  | 0.05 | 0.15 | 0.13 | 0.06 | 0.08 | 0.06 | 0.08 | 0.09 | 0.08 |
| GTR+G+I   | 83     | 2204.70        | 1608.40 | -720.5 | 0.000     | 0.863 | 0.664 | 0.216  | 0.189  | 0.332  | 0.263  | 0.04 | 0.09 | 0.1  | 0.05 | 0.15 | 0.13 | 0.06 | 0.08 | 0.06 | 0.08 | 0.09 | 0.08 |

\*Models with the lowest BIC scores (Bayesian Information Criterion) are considered to describe the substitution pattern the best (written in red and bold). For each model, AICc value (Akaike Information Criterion, corrected), Maximum Likelihood value (lnL), and the number of parameters (including





branch lengths) are also depicted above. 5 rate categories-discrete Gamma distribution (+G) was applied for modeling the evolutionary rates non-uniformity among sites and supposing that a certain fraction of sites is evolutionarily invariable (+I). Proposed or estimated values of transition/transversion bias (R) for each model are displayed. They are followed by nucleotide frequencies ( $f$ ) and rates of base substitutions ( $r$ ) for each nucleotide pair.

\* Abbreviations: TR: General Time Reversible; HKY: Hasegawa-Kishino-Yano; TN93: Tamura-Nei; T92: Tamura 3-parameter; K2: Kimura 2-parameter; JC: Jukes-Cantor.
