# Supplementary figures and images for: Molecular Epidemiology and Surveillance of Human Adenovirus and Rotavirus A Associated Gastroenteritis in Riyadh, Saudi Arabia
Source: MDPI journal article supplement (doi:10.3390/tropicalmed8050279), 2023-05-15

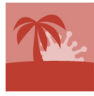

# Supplementary Materials:

## RComb-F: CCACAAYTDTATTGTGATTA

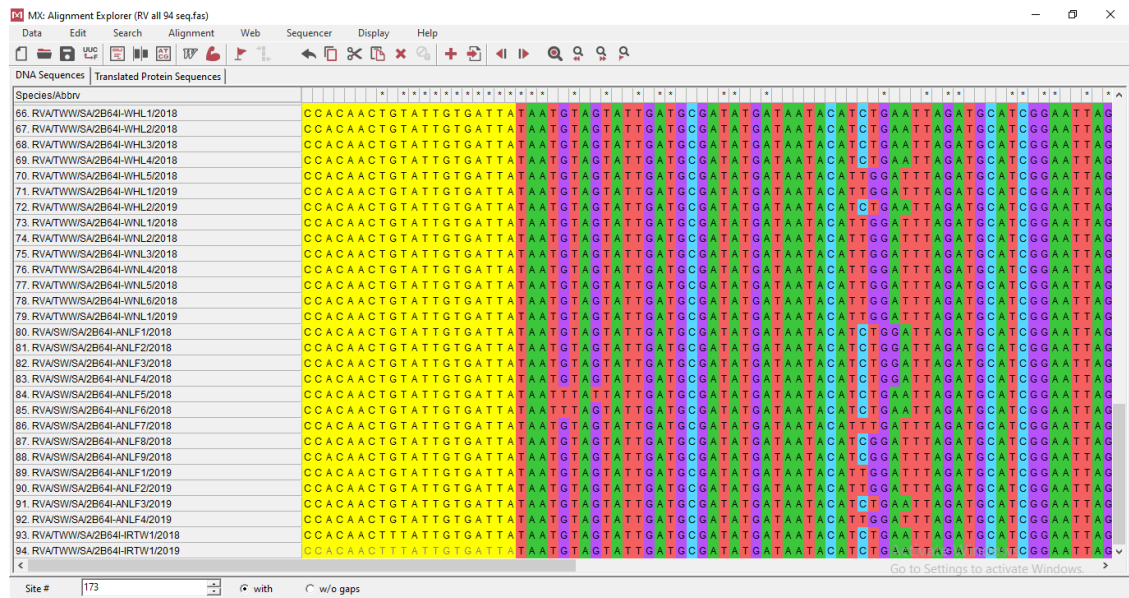

## RComb-R: CCCATYGATATCCAYTTATT

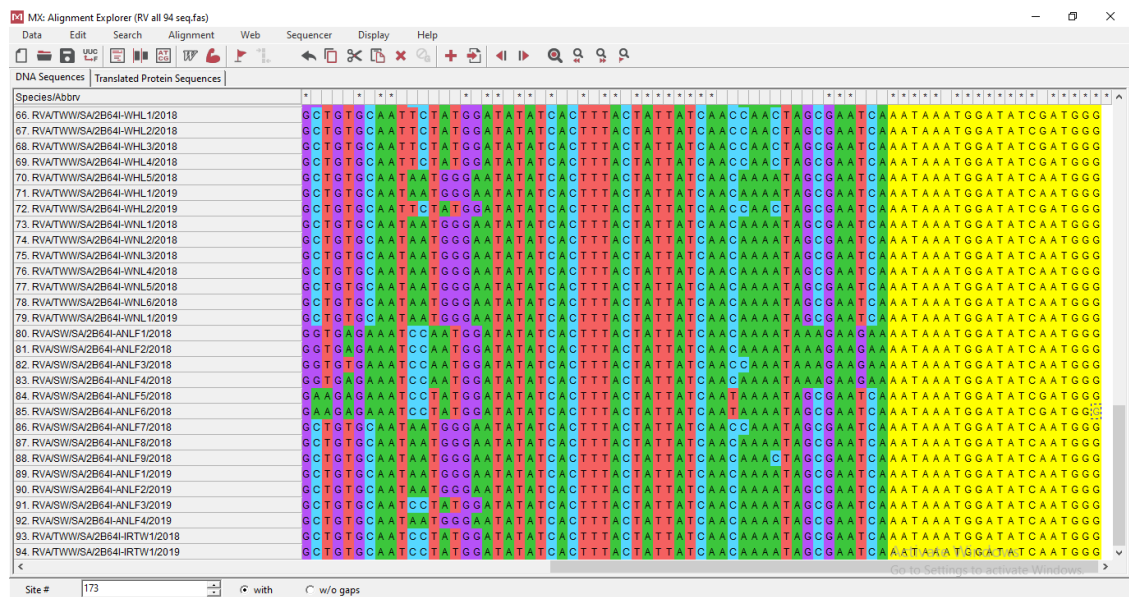

Supplement: s1 [file s1]
